# Supplementary material for: Health risks and source apportionment assessment of heavy metals in PM 2.5 : A one year observation study in Chengdu
Source: Research Square preprint supplement (doi:10.21203/rs.3.rs-8241179/v1), 2025-12-03
Supplement: Supplementary file 1 [file f412b2137856efccde0c7357.docx]

**SUPPLEMENTARY MATERIAL**

**Health risks and source apportionment assessment of heavy metals in PM2.5: A one year observation study in Chengdu**

Xiaoqiong Fenga,c, Jiaxiu Guob*, Zhijiong Huangd, Tao Jiangc, Hong Liuc, Xiaotong Lvc

a College of Architecture & Environment, Sichuan University, Chengdu 610041, China

b College of Carbon Neutrality Future Technology, Sichuan University, Chengdu 610065, Sichuan, China

c Sichuan Academy of Eco-Environmental Sciences, Chengdu 610041, China

d Institute for Environmental and Climate Research, Jinan University, Guangzhou 510632, China

*Corresponding author: College of Carbon Neutrality Future Technology, Sichuan University, Chengdu 610065, Sichuan, China. guojiaxiu@scu.edu.cn

**Supplementary Tables:**

Table S1 MDL of each HM（ng/m3）

| Element | Cr | Mn | Co | Cu | Zn | Cd | Ba | Pb | Fe |
| --- | --- | --- | --- | --- | --- | --- | --- | --- | --- |
| MDL | 4.08 | 4.44 | 5.38 | 1.27 | 2.43 | 1.8 | 20.04 | 2.041 | 15.46 |

Table S2 Monthly data detection rates of HMs during the study period

| Month | Cr | Mn | Co | Cu | Zn | Cd | Ba | Pb | Fe |
| --- | --- | --- | --- | --- | --- | --- | --- | --- | --- |
| 2023-01 | 99% | 99% | 99% | 97% | 99% | 64% | 99% | 98% | 99% |
| 2023-02 | 99% | 99% | 99% | 99% | 99% | 91% | 99% | 99% | 99% |
| 2023-03 | 97% | 97% | 97% | 97% | 97% | 99% | 97% | 97% | 97% |
| 2023-04 | 99% | 99% | 99% | 99% | 99% | 99% | 99% | 99% | 99% |
| 2023-05 | 100% | 100% | 100% | 100% | 100% | 100% | 100% | 100% | 100% |
| 2023-06 | 99% | 99% | 99% | 99% | 99% | 99% | 99% | 99% | 99% |
| 2023-07 | 100% | 100% | 100% | 100% | 100% | 100% | 100% | 100% | 100% |
| 2023-08 | 100% | 100% | 100% | 100% | 99% | 100% | 100% | 100% | 100% |
| 2023-09 | 100% | 100% | 100% | 100% | 100% | 100% | 100% | 100% | 99% |
| 2023-10 | 94% | 94% | 94% | 94% | 94% | 94% | 94% | 94% | 93% |
| 2023-11 | 100% | 100% | 100% | 100% | 100% | 100% | 100% | 100% | 100% |
| 2023-12 | 87% | 87% | 87% | 87% | 87% | 87% | 87% | 87% | 87% |

Table S3 The parameters for health risk assessment

| Parameter | Unit | Definition | Male | Female | Children | Reference |
| --- | --- | --- | --- | --- | --- | --- |
| IR | m3/day | Inhalation rate | 17.4 | 14.1 | 8.6 | Duan et al., 2015; M.o.E. Protection, 2013 |
| EF | d/s | Seasonal exposure frequency | 90 (Spring, summer, autumn and Winter) | 90 (Spring, summer, autumn and Winter) | 90 (Spring, summer, autumn and Winter) | This study |
| d/s | Seasonal exposure frequency | 7 (Spring Festival) | 7 (Spring Festival) | 7 (Spring Festival) | This study |
| d/a | Annual exposure frequency | 360 | 360 | 360 | Shi et al., 2025 |
| ED | a | Exposure duration | 30 | 30 | 6 | Chakraborty et al., 2024 |
| BW | kg | Body weight | 63.6 | 55.4 | 15 | Hossain et al., 2021; M.o.E. Protection, 2013 |
| ATn | d | Average time for non-carcinogens | ED × 365 days × 24 h/day | ED × 365 days × 24 h/day | ED × 365 days × 24 h/day | Liu et al., 2021 |
| d | Average time for carcinogens | 70 year × 365 days/year × 24 h | 70 year × 365 days/year × 24 h | 70 year × 365 days/year × 24 h | Liu et al., 2021 |

Table S4 HMs exposure reference dose and carcinogenic slope coefficient

| HMs | RfD (mg/(kg·day)) | SF ((kg·day)/mg) | Reference |
| --- | --- | --- | --- |
| Cr | 3.0×10-4 | 5.1×102 | USEPA, 2011 |
| Mn | 1.4×10-1 | 5.6×101 | USEPA, 2011; Li et al., 2022 |
| Co | 5.7×10-5 | 9.8×101 | USEPA, 2011 |
| Cu | 4.0×10-2 | / | Nargis et al., 2022 |
| Zn | 3.0×10-1 | / | USEPA, 2011 |
| Cd | 1.0×10-3 | 1.5×101 | Rahat, et al., 2025; USEPA, 2011 |
| Ba | 2.0×10-1 | / | USEPA, 2011 |
| Pb | 3.5×10-3 | 4.2×10-2 | Nargis et al., 2022 |
| Fe | 7.0×10-1 | / | Peng et al., 2025 |

Table S5 Comparison of the results of this study with those of other study (ng/m3)

| HM | Sampling period | | | |
| --- | --- | --- | --- | --- |
| January 2023-December 2023 | March 2017-February 2018 | October 2014-July 2015 | April 2009- January 2020 |
| Cr | 3.37 | 8.3 | 5.6 | 17.9 |
| Mn | 18.67 | 48 | 33.8 | 137.6 |
| Co | 30.66 | / | / | / |
| Cu | 10.97 | 73 | 18.7 | 54.1 |
| Zn | 58.4 | 167 | 238 | 822.9 |
| Cd | 15.66 | 10 | / | 9.5 |
| Ba | 125.84 | 78 | / | / |
| Pb | 13.41 | 40 | 55.4 | 320.5 |
| Fe | 328.37 | 967 | 456 | / |
| Reference | This study | Jin et al., 2021 | Wang et al., 2018 | Li et al., 2016 |

Table S6 Monthly industrial electricity consumption in 2023 in Chengdu (million kilowatt-hours)

| Season | Month | Industrial electricity consumption |
| --- | --- | --- |
| Spring | March | 3079.4 |
| April | 3331.2 |
| May | 3394.1 |
| Subtotal | 9804.8 |
| Summer | June | 3439.1 |
| July | 3600.5 |
| August | 3645.1 |
| Subtotal | 10684.7 |
| Autumn | September | 3462.1 |
| October | 3200.3 |
| November | 3377.7 |
| Subtotal | 10040.2 |
| Winter | December | 3467.8 |
| January | 2671.0 |
| February | 3015.5 |
| Subtotal | 9154.3 |

**Supplementary Figures:**


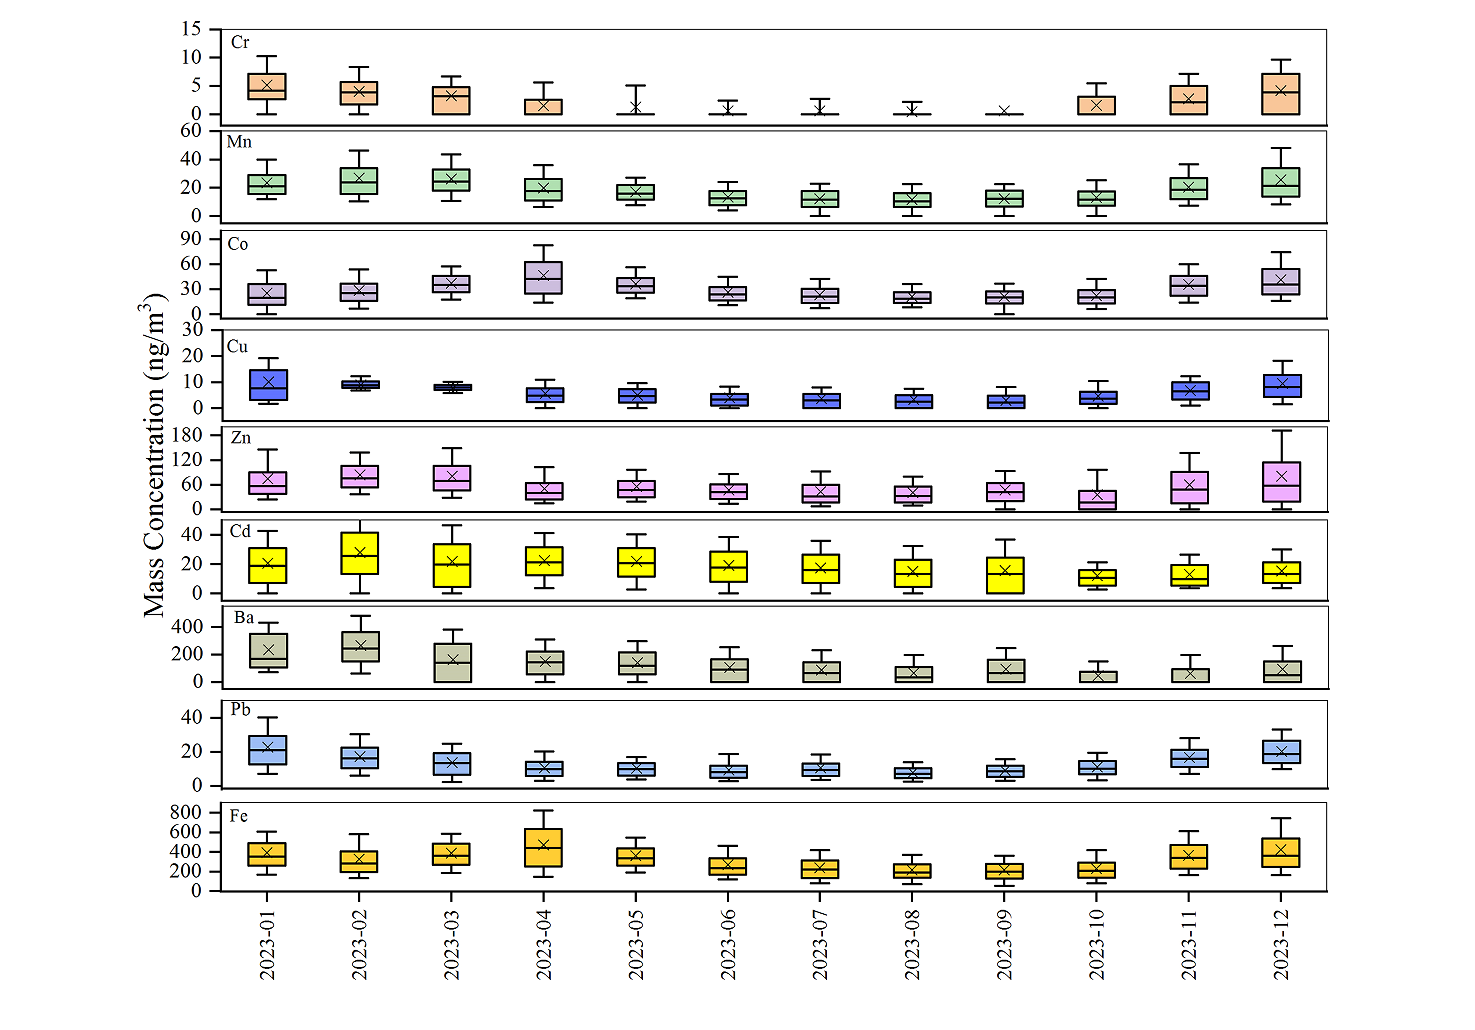


Fig. S1 Monthly average concentration distribution of each heavy metal


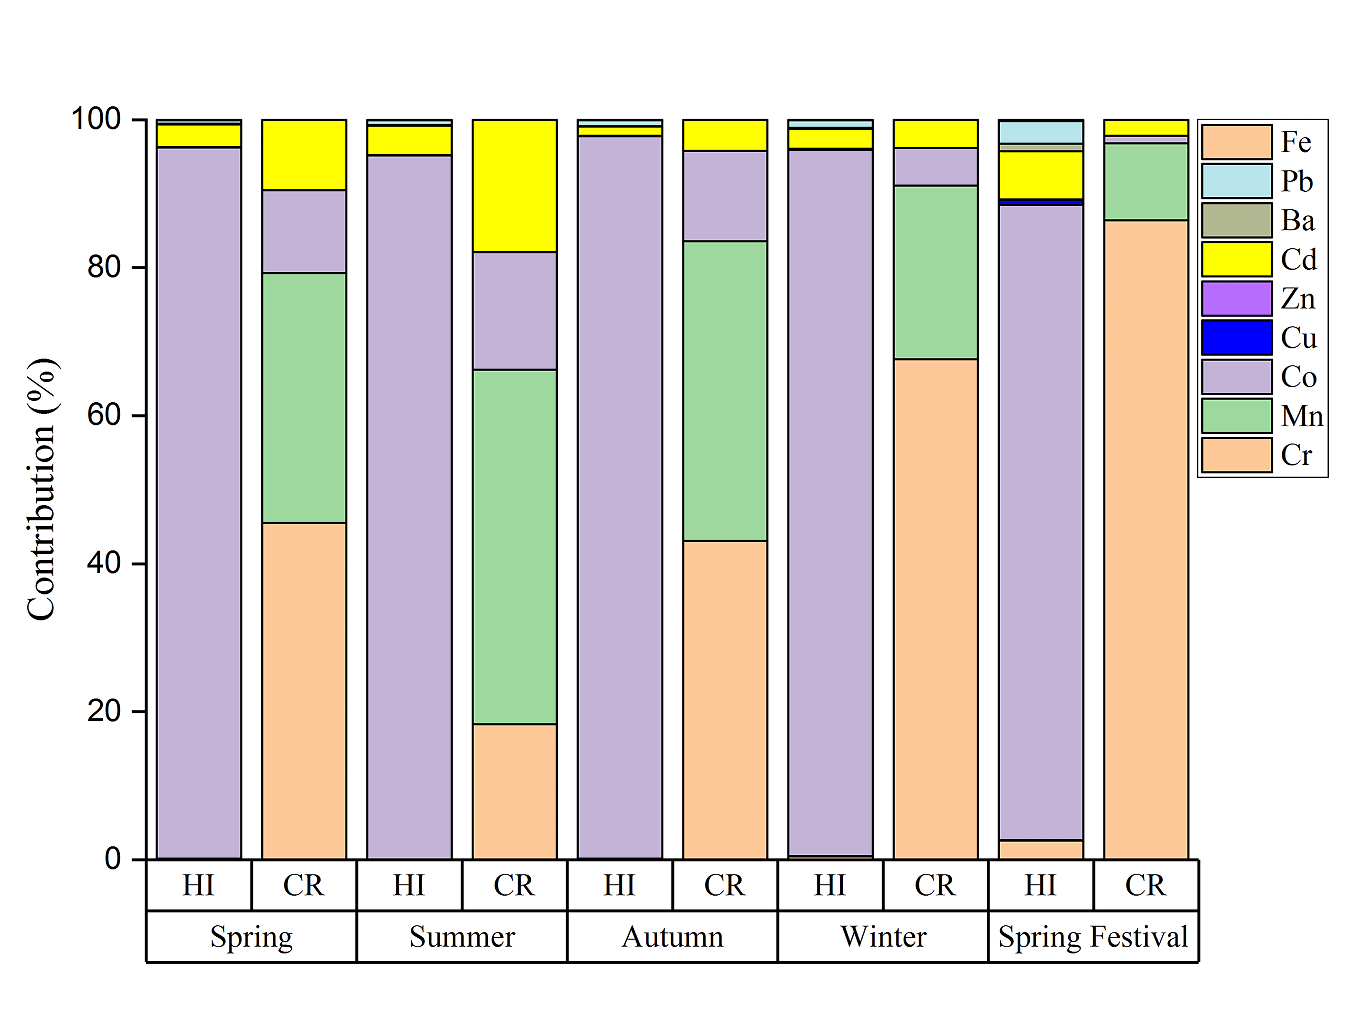


Fig. S2 The contributions of various metals to health risks during the spring, summer, autumn, winter, and Spring Festival. HI: Hazard Index, HQ: Hazard Quotient.


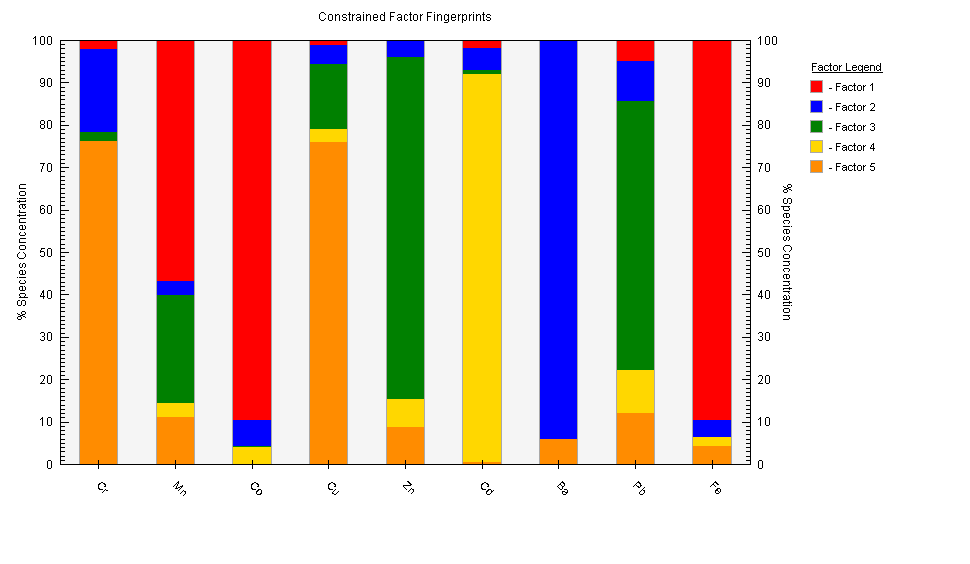
Fig. S3 Factor fingerprints for HMs derived using PMF model during the study period

**Reference**

USEPA, 2011. Risk Assessment Guidance for Superfund. In: Part A: Human Health Evaluation Manual; Part E, Supplemental Guidance for Dermal Risk Assessment; Part F, Supplemental Guidance for Inhalation Risk Assessment.

Nargis, A., Habib, A., Islam, M.N., Chen, K., Sarker, M.S.I., Al-Razee, A.N.M., Liu, W., Liu, G., Cai, M., 2022. Source identification, contamination status and health risk assessment of heavy metals from road dusts in Dhaka, Bangladesh. J. Environ. Sci. 121, 159–174.

Li, X.,Yan, C.Q., Wang, C.Y., Ma, J.J., Li, W.X., Liu, J.Y., Liu, Y., 2022. PM2.5⁃bound elements in Hebei Province, China: Pollution levels, source apportionment and health risks. Sci. Total Environ. 806(Pt 1): 150440

Peng, J.M., Yu, R.L., Hu G.R., Chen, Y.T., Wu, Y.Q., 2025. Sources and Health Risks of Heavy Metals in Atmospheric PM2.5, Based on APCS-MLR and PMF Models. Environ. Sci. [https://doi.org/10.13227/j.hjkx.202409324. (in](https://doi.org/10.13227/j.hjkx.202409324.%20(in) Chinese)

Duan, X., Zhao, X., Wang, B., Chen, Y., Cao, S., 2015. Highlights of the Chinese Exposure Factors Handbook.

Hossain, M.A., Haque, S.S., Sarkar, M.S., Khan, M.D.H., 2021. Health Risk Assessment of Black Carbon Emission from Fossil Fuel, J. Eng. Sci. 12, 23-28.

Liu, S., Tian, H., Bai, X., Zhu, C., Wu, B., Luo, L., Hao, Y., Liu, W., Lin, S., Zhao,,S., Wang,,K., Liu, K., Gao, J., Zhang, Q., Zhang, K., Kan, H., Liu, Y., Hao, J., 2021. Significant but Spatiotemporal-Heterogeneous Health Risks Caused by Airborne Exposure to Multiple Toxic Trace Elements in China, Environ. Sci. Technol. 55(19), 12818–12830.

Jin, Q., Liu, Y.M., Feng, M., Huang, C.M., 2021. High‑resolution temporal metallic elements in PM2.5 in Chengdu, Southwest China: variations, extreme events, and effects of meteorological parameters. Air Qual. Atmos. Health. 14:1893–1909.

Shi, J.L., Zhu, C.S., Qu, Y., Zhou, Y., Wang, N., Wang, L.Y., Li, Q., Wang, Q.Y., Liu, S.X., Cao, J., 2025. Health risk assessment of source-specific elemental carbon (using dual carbon isotopes) and heavy metals in the Tibetan Plateau. J. Hazard. Mater. 492, 138094.

M.o.E. Protection, 2013a. Exposure factors handbook of Chinese population (Adults Volume). China Environmental Science Press.

M.o.E. Protection, 2013b. Exposure factors handbook of Chinese population (Children Volume). China Environmental Science Press.

Chakraborty, M., Rahat, M.M.R., Choudhury, T.R., Nigar, R., Liu, G., Habib, A., 2024. Heavy metal contamination and health risk assessment of road dust from landfills in Dhaka-Narayanganj, Bangladesh. Emerg. Contam. 10, 100278.

Rahat, M.M.R., Rumman, R., Ferdousi, F.K., Zhao, S.Z., Siddique, M.A.B., Zhang, G., Liu, G.R., Habib, A., 2025. Heavy metals in atmospheric fine particulate matter (PM2.5) in Dhaka, Bangladesh: Source apportionment and associated health risks. Environ. Res. 271, 121071.

Li, Y.P., Zhang, Z.S., Liu, H.F., Zhou, H., Fan, Z.Y., Lin, M., Wu, D.L., Xia, B.C., 2016. Characteristics, sources and health risk assessment of toxic heavy metals in PM2.5 at a megacity of southwest China. Environ. Geochem. Health. 38:353–362.

Wang, H., Qiao, B., Zhang, L., Yang, F., Jiang, X., 2018. Characteristics and sources of trace elements in PM2.5 in two megacities in Sichuan Basin of southwest China. Environ. Pollu. 242:1577–1586.
